# Supplementary material for: Prevalence of nephropathy among type two diabetes patients in Eastern Mediterranean Region: A systematic review and meta-analysis
Source: Research Square preprint supplement (doi:10.21203/rs.3.rs-518100/v2), 2021-12-29
Supplement: Supplementary file 1 [file 049da4b228135cb78ba36182.docx]

| **Appendix 1.** Search strategy in PubMed from January 1, 2000 to December 13, 2020 |
| --- |
| #1. (Nephropathy[Title/Abstract]) OR Nephropathies[Title/Abstract]) OR Kidney[Title/Abstract]) OR Renal[Title/Abstract]) OR Microalbuminuria[Title/Abstract]) OR Macroalbuminuria [Title/Abstract]) OR Proteinuria[Title/Abstract]) OR Urineprotein) |
| #2. (Diabetes[Title/Abstract]) OR Hyperglycemia[Title/Abstract]) OR impaired glucose tolerance[Title/Abstract]) OR impaired fasting glucose[Title/Abstract]) |
| #3. (EMR$[Title/Abstract]) OR Eastern Mediterranean Region[Title/Abstract]) OR Eastern Mediterranean Regional[Title/Abstract]) OR Yemen[Title/Abstract]) OR United Arab Emirates[Title/Abstract]) OR Tunisia[Title/Abstract]) OR Syria$[Title/Abstract]) OR Sudan[Title/Abstract]) OR Somalia[Title/Abstract]) OR Saudi Arabia[Title/Abstract]) OR Qatar[Title/Abstract]) OR Palestine[Title/Abstract]) OR Oman[Title/Abstract]) OR Pakistan[Title/Abstract]) AND Morocco[Title/Abstract]) OR Libya[Title/Abstract]) OR Lebanon[Title/Abstract]) OR Kuwait[Title/Abstract]) OR Jordan[Title/Abstract]) OR Iraq[Title/Abstract]) OR Iran[Title/Abstract]) OR Egypt[Title/Abstract]) OR Djibouti[Title/Abstract]) OR Bahrain[Title/Abstract]) OR Afghanistan[Title/Abstract]) |
| #4. (#1 AND #2 AND #3) |
