# Supplementary material for: Prevalence of nephropathy among type two diabetes patients in Eastern Mediterranean Region: A systematic review and meta-analysis
Source: Research Square preprint supplement (doi:10.21203/rs.3.rs-518100/v2), 2021-12-29
Supplement: Supplementary file 2 [file 5c96aeee803a75cf1da6a6e2.docx]

| 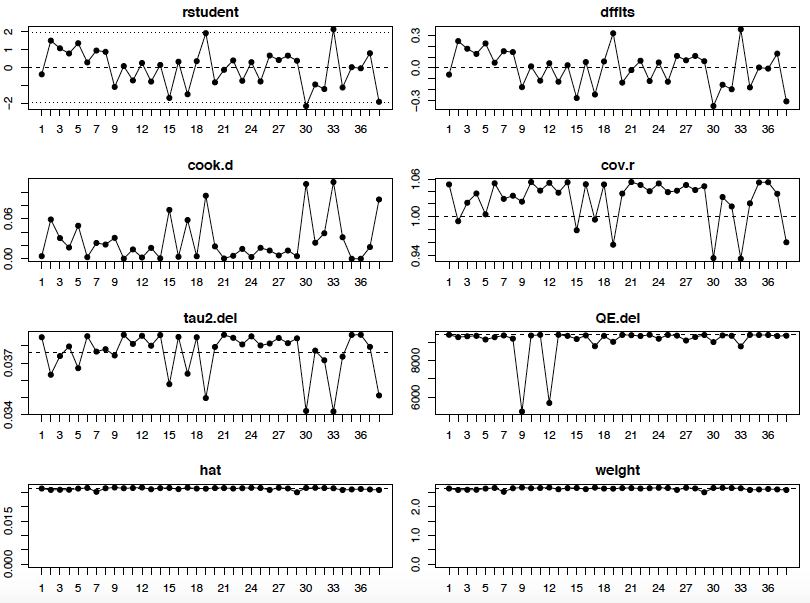 |
| --- |
| **Appendix 9.** Plots of leave-one-out diagnostic tests to determine influential studies [Note for interpretation: Influential studies would label in red. In our analysis, no study was found to be influential.] |
